# Supplementary material
Source: PubMed Central journal article supplement (PMC6173970)
Supplement: NIHMS1502931-supplement-1.pdf [file NIHMS1502931-supplement-1.pdf]

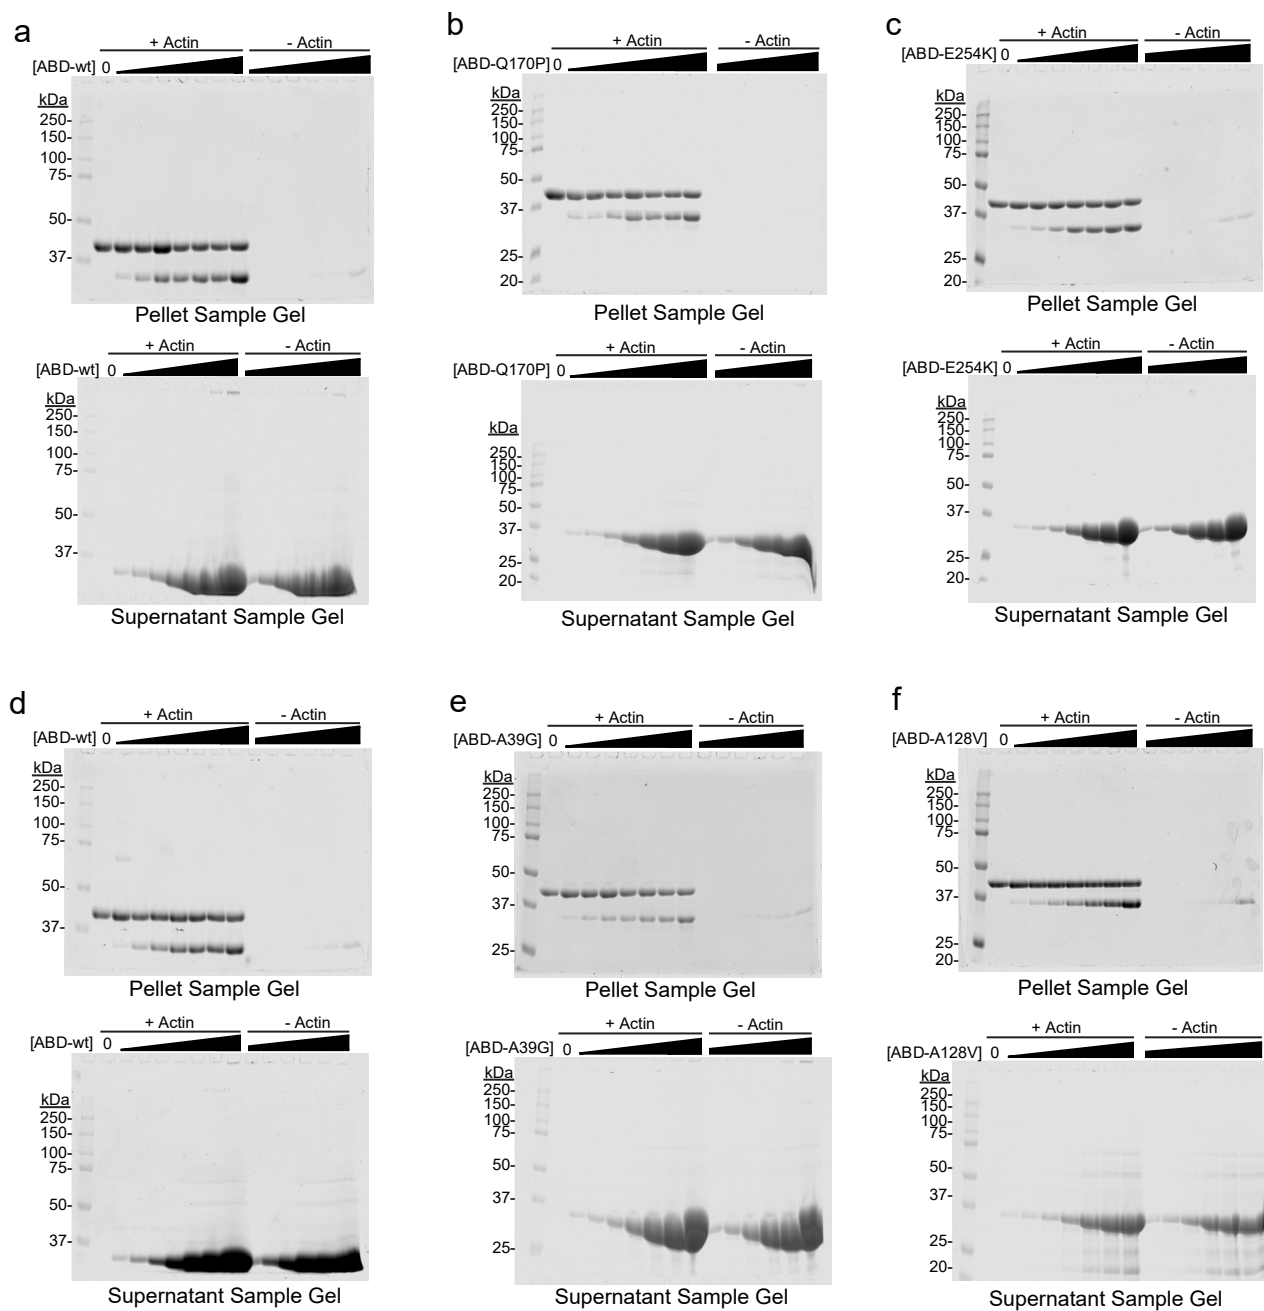

**Supplementary Data Set 1. Uncropped Coomassie-stained SDS-PAGE gels from co-sedimentation assays.** **a** Pellet (top) and supernatant (bottom) sample gels of FLNaABD-wt co-sedimentation assay shown in Fig. 5f. **b** Pellet (top) and supernatant (bottom) sample gels of FLNaABD-Q170P co-sedimentation assay shown in Fig. 5f. **c** Pellet (top) and supernatant (bottom) sample gels of FLNaABD-E254K co-sedimentation assay shown in Fig. 5f. **d** Pellet (top) and supernatant (bottom) sample gels of FLNaABD-wt co-sedimentation assay shown in Fig. 6c. **e** Pellet (top) and supernatant (bottom) sample gels of FLNaABD-A39G co-sedimentation assay shown in Fig. 6c. **f** Pellet (top) and supernatant (bottom) sample gels of FLNaABD-A128V co-sedimentation assay shown in Fig. 6c. Note that for all co-sedimentation assays, the highest points on the ABD titration curves (found in lanes 9 and 15) were consistently excluded from binding analyses because these samples were inadvertently prepared without co-sedimentation buffer containing fresh DTT.
