# Supplementary material
Source: PubMed Central journal article supplement (PMC6173970)
Supplement: NIHMS1502931-supplement-5.pdf [file NIHMS1502931-supplement-5.pdf]

Journal:

Manuscript Number:

Proposed Title of Contribution:  (the 'Contribution')

Author(s) [Please list all named Authors]:  (the 'Author(s)')

**To: Nature America, Inc., part of Springer Nature (the "Publisher")**

- 1 In consideration of the Publisher evaluating the Contribution for publication (and publishing the Contribution if the Publisher so decides) the Author(s) grant to the Publisher for the full term of copyright and any extensions thereto, subject to clause 2 below, the exclusive right and irrevocable license:
  - (a) to edit, adapt, publish, reproduce, distribute, display and store the Contribution in all forms, formats and media whether now known or hereafter developed (including without limitation in print, digital and electronic form) throughout the world;
  - (b) to translate the Contribution into other languages, create adaptations, summaries or extracts of the Contribution or other derivative works based on the Contribution and exercise all of the rights set forth in (a) above in such translations, adaptations, summaries, extracts and derivative works;
  - (c) to license others to do any or all of the above; and
  - (d) to re-license article metadata without restriction (including but not limited to author name, title, abstract, citation, references, keywords and any additional information, as determined by the Publisher).
- 2 Ownership of copyright remains with the Author(s), and provided that, when reproducing the Contribution or extracts from it or the Supplementary Information (defined below), the Author(s) acknowledge first and reference publication in the Journal, the Author(s) retain only the following non-exclusive rights:
  - (a) to reproduce the Contribution in whole or in part in any printed volume (book or thesis) of which they are the Author(s);
  - (b) they and any academic institution where they work may reproduce the Contribution for the purpose of course teaching;
  - (c) to post a copy of the Contribution as accepted for publication after peer review (in a locked word processing file, or a PDF version thereof) on the Author(s)' own web sites, or institutional repositories, or the Author(s)' funding body(s)' archive, six months after publication of the printed or online edition of the Journal, provided that they also link to the Contribution on the Publisher's web site; and
  - (d) to reuse figures or tables created by the Author(s) and contained in the Contribution in oral presentations and other works created by them.
- 3 The Author(s) grant to the Publisher for the full term of copyright and any extensions thereto the same rights that have been granted in respect of the Contribution as set out in clause 1 above, in and to all supplementary material in any form (including without limitation images, videos, checklists, tables and/or graphs) submitted by the Author(s) to the Publisher with or in connection with the Contribution ("Supplementary Information") but on a non-exclusive basis.
- 4 The Publisher acknowledges that an earlier version of the Contribution and/or Supplementary Information may have been submitted to a pre-print service (in accordance with that service's standard license terms).
- 5 The Author(s) warrant and represent that:
  - (a) the Author(s) are the sole Author(s) of and sole owners of the copyright in the Contribution and the Supplementary Information and the Contribution and the Supplementary Information is the original work of the Author(s) and not copied (in whole or part) from another work. If however the Contribution or the Supplementary Information includes materials from other sources, the Author(s) warrant they have obtained the necessary rights from the owners of the copyright in all such materials and hereby license to the Publisher the rights to use such materials in accordance with the grant of rights in clause 1. Copies of all such grant of rights from third parties are attached to this license;
  - (b) all of the facts contained in the Contribution and the Supplementary Information are true and accurate;
  - (c) the signatory (the Author or the employer) who has signed this Agreement below has full right, power and authority to enter into this Agreement and grant the rights herein on behalf of all of the Authors;
  - (d) nothing in the Contribution or the Supplementary Information is obscene, defamatory, libelous, violates any right of privacy or publicity, infringes any intellectual property rights (including without limitation copyright, patent, database or trademark rights) or any other human, personal or other rights of any person or entity or is otherwise unlawful; and
  - (e) nothing in the Contribution or the Supplementary Information infringes any duty of confidentiality which any of the Author(s) may owe to anyone else or violates any contract, express or implied, of any of the Author(s), and all of the institutions in

which work recorded in the Contribution or the Supplementary Information was created or carried out, have authorized such publication.

- 6 The Author(s) authorize the Publisher to take such steps as it considers necessary at its own expense in the Author(s) name and on their behalf if the Publisher believes that a third party is infringing or is likely to infringe copyright in the Contribution and/or Supplementary Information including but not limited to initiating legal proceedings.
- 7 The Author(s) grant the Publisher the perpetual right to edit, correct, or retract the Contribution and Supplementary Information if the Publisher considers (in its reasonable opinion) that such actions are required. The Author(s) hereby agree that they shall not object to the Publisher carrying out any such actions.
- 8 The Author(s) shall cooperate fully with the Publisher in relation to any legal action that might arise from the publication of the Contribution and/or Supplementary Information and the Author(s) shall give the Publisher access at reasonable times to any relevant accounts, documents and records within the power or control of the Author(s).
- 9 If the Contribution is rejected by the Publisher and not published, all rights under this license shall revert to the Author(s).
- 10 This Agreement shall be governed by the laws of the State of New York, without regards to any conflict of law provisions. The parties submit to the exclusive jurisdiction of the courts located in New York, New York.

Signed for and on behalf of the Author(s) [Handwritten signatures only]:

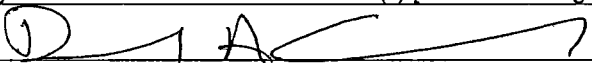

Print Name:

Date:

Address:

Does the Contribution and/or the Supplementary Information contain material from third parties (including previously published images/figures)?

- Yes (if yes, please ensure copies of the grant of rights are submitted with this form as indicated in clause 5(a))
- No

Office use only:

Nature America Inc., part of Springer Nature.  
Principal place of business: One New York Plaza, Suite 4500, New York, NY 10004-1562, USA
