# Supplementary material
Source: PubMed Central journal article supplement (PMC6173970)
Supplement: NIHMS1502931-supplement-7.pdf [file NIHMS1502931-supplement-7.pdf]

|      | ABS-N | CH1-A                                                                                                                                                                                                                                                                                                                                                                                                                                                                                                                                                                                      | CH1-B                                                                                                                                                                                 | CH1-C                                                                                                                                                                                                                                                                                                                                                                                                                                                                                                                                                                                                                                  | ABS2' | CH1-E                                                                                                                                                                                                                                                                                                                                                                                                                                                                                                                                                                                                                                     | ABS2  | CH1-F                                                                                                                                                                                                                                                                                                                                                                                                                                                                                                                                                                                                                                            | CH1-G |                                                                                                                                                                                                                                                                                                                                                                                                                                                                                                                                                                                                                                                  |     |                                                                                                                                                                                                                                                                                                                                                                                                                                                                                                                                                                                                                             |     |                                                                                                                                                                                                                                                                                                                                                                                                                                                                                                                                                                                                                                                                                                     |     |                                                                                                                                                                                                                                                                                                                                                                                                                                                                                                                                                                                                                                                              |     |                                                                                                                                                                                                                                                                                                                                                                                                                                                                                                                                                                                                                                                                    |           |                                                                                                                                                                                                                                                                                                                                                                                                                                                                                                                                                                                                                                                                                          |           |                                                                                                                                                                                                                                                                                                                                                                                |
|------|-------|--------------------------------------------------------------------------------------------------------------------------------------------------------------------------------------------------------------------------------------------------------------------------------------------------------------------------------------------------------------------------------------------------------------------------------------------------------------------------------------------------------------------------------------------------------------------------------------------|---------------------------------------------------------------------------------------------------------------------------------------------------------------------------------------|----------------------------------------------------------------------------------------------------------------------------------------------------------------------------------------------------------------------------------------------------------------------------------------------------------------------------------------------------------------------------------------------------------------------------------------------------------------------------------------------------------------------------------------------------------------------------------------------------------------------------------------|-------|-------------------------------------------------------------------------------------------------------------------------------------------------------------------------------------------------------------------------------------------------------------------------------------------------------------------------------------------------------------------------------------------------------------------------------------------------------------------------------------------------------------------------------------------------------------------------------------------------------------------------------------------|-------|--------------------------------------------------------------------------------------------------------------------------------------------------------------------------------------------------------------------------------------------------------------------------------------------------------------------------------------------------------------------------------------------------------------------------------------------------------------------------------------------------------------------------------------------------------------------------------------------------------------------------------------------------|-------|--------------------------------------------------------------------------------------------------------------------------------------------------------------------------------------------------------------------------------------------------------------------------------------------------------------------------------------------------------------------------------------------------------------------------------------------------------------------------------------------------------------------------------------------------------------------------------------------------------------------------------------------------|-----|-----------------------------------------------------------------------------------------------------------------------------------------------------------------------------------------------------------------------------------------------------------------------------------------------------------------------------------------------------------------------------------------------------------------------------------------------------------------------------------------------------------------------------------------------------------------------------------------------------------------------------|-----|-----------------------------------------------------------------------------------------------------------------------------------------------------------------------------------------------------------------------------------------------------------------------------------------------------------------------------------------------------------------------------------------------------------------------------------------------------------------------------------------------------------------------------------------------------------------------------------------------------------------------------------------------------------------------------------------------------|-----|--------------------------------------------------------------------------------------------------------------------------------------------------------------------------------------------------------------------------------------------------------------------------------------------------------------------------------------------------------------------------------------------------------------------------------------------------------------------------------------------------------------------------------------------------------------------------------------------------------------------------------------------------------------|-----|--------------------------------------------------------------------------------------------------------------------------------------------------------------------------------------------------------------------------------------------------------------------------------------------------------------------------------------------------------------------------------------------------------------------------------------------------------------------------------------------------------------------------------------------------------------------------------------------------------------------------------------------------------------------|-----------|------------------------------------------------------------------------------------------------------------------------------------------------------------------------------------------------------------------------------------------------------------------------------------------------------------------------------------------------------------------------------------------------------------------------------------------------------------------------------------------------------------------------------------------------------------------------------------------------------------------------------------------------------------------------------------------|-----------|--------------------------------------------------------------------------------------------------------------------------------------------------------------------------------------------------------------------------------------------------------------------------------------------------------------------------------------------------------------------------------|
| FLNa | 1     | .....MSSSHSRAGQSAAGAAPPGGVDRDAEMPATEK <b>LAEDA</b> PWKKIQONTFTRWCNEHLKCVSKR.IANLQTDLS <b>GLRLIAL</b> VLSQKKM <b>RKHNR</b> PTFR <b>MOLE</b> ENVSVALEFLDRES <b>IKL</b> VSIDSKA <b>IVDGNLKLILGLI</b> WTLLIH <b>YS</b>                                                                                                                                                                                                                                                                                                                                                                         | .....MPVTEKDLAEDAPWKKIQONTFTRWCNEHLKCVNKR.IGNLQTDLS <b>DGLRLIAL</b> LEVLVSQKRM <b>RKYHQ</b> RPTFR <b>MOLE</b> ENVSVALEFLDRES <b>IKL</b> VSIDSKA <b>IVDGNLKLILGLI</b> WTLLIH <b>YS</b> | .....MMNNSGYSDAGLGLGDETD.....EMPSTEKDLAEDAPWKKIQONTFTRWCNEHLKCVGKR.LTDLQTDLS <b>DGLRLIAL</b> LEVLVSQKRM <b>RKFP</b> RPFR <b>MOLE</b> ENVSVALEFLEREHI <b>KL</b> VSIDSKA <b>IVDGNLKLILGLI</b> WTLLIH <b>YS</b>                                                                                                                                                                                                                                                                                                                                                                                                                           | 1     | .....MDHYDSQQTNDYMQPE.EDWDRDLLDP <b>AWEK</b> QOR <b>KTF</b> TAWCNSHLR <b>KAGT</b> Q.IENIEEDFRDGLK <b>LMLLE</b> LVISGERL <b>AKP</b> ..ERGM <b>R</b> VHKISNVNKALDFI <b>ASKG</b> VK <b>LV</b> ISIG <b>AE</b> IVDGNVKMTLGM <b>IWT</b> ILR <b>FA</b>                                                                                                                                                                                                                                                                                                                                                                                           | 1     | .....MNQIEPGV. <b>Q</b> YNYVYDE..DEYMIQE.EEWDRDLLDP <b>AWEK</b> QOR <b>KTF</b> TAWCNSHLR <b>KAGT</b> Q.IENIEEDFRNGLK <b>LMLLE</b> LVISGERL <b>AKP</b> ..DRG <b>K</b> MR <b>F</b> H <b>K</b> IANVNKALDYI <b>ASK</b> G <b>VK</b> LVISIG <b>AE</b> IVDGNVKMTLGM <b>IWT</b> ILR <b>FA</b>                                                                                                                                                                                                                                                                                                                                                            | 1     | .....MMVMQPEGLGAGEGRFAGGGGG..GEYMEQE.EDWDRDLLDP <b>AWEK</b> QOR <b>KTF</b> TAWCNSHLR <b>KAGT</b> Q.IENIEEDFRNGLK <b>LMLLE</b> LVISGERL <b>AKP</b> ..D <b>G</b> K <b>M</b> R <b>F</b> H <b>K</b> IANVNKALDFI <b>ASKG</b> VK <b>LV</b> ISIG <b>AE</b> IVDGNLKM <b>T</b> LGM <b>IWT</b> ILR <b>FA</b>                                                                                                                                                                                                                                                                                                                                               | 1   | .....MVDYHAANQSYQYGPSSAGNGAGGGGSMGDYMAQE.DDWDRDLLDP <b>AWEK</b> QOR <b>KTF</b> TAWCNSHLR <b>KAGT</b> Q.IENIEEDFRDGLK <b>LMLLE</b> LVISGERL <b>AKP</b> ..ERGM <b>R</b> VHKISNVNKALDFI <b>ASKG</b> VK <b>LV</b> ISIG <b>AE</b> IVDGNAKMTLGM <b>IWT</b> ILR <b>FA</b>                                                                                                                                                                                                                                                                                                                                                          | 1   | MSSTLSP <b>T</b> DFD <b>S</b> LE <b>I</b> Q <b>Q</b> YSD <b>I</b> NNR <b>W</b> DL <b>P</b> DS <b>D</b> W <b>D</b> ND <b>S</b> SAR <b>L</b> F <b>E</b> RS <b>R</b> I <b>K</b> ALAD <b>E</b> RE <b>A</b> V <b>Q</b> K <b>T</b> F <b>T</b> K <b>W</b> VNSHLAR <b>V</b> TC <b>R</b> .V <b>G</b> D <b>L</b> Y <b>S</b> DL <b>R</b> D <b>G</b> R <b>N</b> LL <b>R</b> L <b>L</b> EV <b>L</b> S <b>G</b> E <b>L</b> LP <b>K</b> P <b>P</b> ..T <b>K</b> GR <b>M</b> R <b>I</b> H <b>C</b> L <b>E</b> NV <b>D</b> KAL <b>Q</b> FL <b>K</b> E <b>Q</b> R <b>V</b> H <b>L</b> EN <b>M</b> GS <b>H</b> D <b>I</b> VD <b>G</b> N <b>H</b> R <b>L</b> T <b>L</b> GL <b>V</b> W <b>T</b> I <b>L</b> LR <b>F</b> Q | 1   | .....MLWWEV.V.E <b>D</b> CYER <b>E</b> D <b>V</b> Q <b>K</b> T <b>F</b> T <b>K</b> W <b>V</b> NA <b>Q</b> F <b>S</b> K <b>F</b> G <b>Q</b> H <b>I</b> EN <b>L</b> F <b>S</b> D <b>L</b> Q <b>Q</b> R <b>R</b> LL <b>D</b> E <b>G</b> L <b>T</b> G <b>Q</b> K <b>L</b> P <b>K</b> ..E <b>K</b> G <b>S</b> T <b>R</b> V <b>H</b> A <b>L</b> NN <b>V</b> N <b>K</b> A <b>L</b> V <b>L</b> Q <b>N</b> N <b>V</b> D <b>I</b> V <b>N</b> I <b>G</b> S <b>T</b> D <b>I</b> VD <b>G</b> N <b>H</b> K <b>L</b> T <b>L</b> GL <b>I</b> W <b>N</b> I <b>L</b> H <b>Q</b>                                                                                                | 1   | .....MAKYGEHEASPDNGQNEFS <b>D</b> I <b>K</b> RS <b>D</b> E <b>H</b> ND <b>V</b> Q <b>K</b> T <b>F</b> T <b>K</b> W <b>I</b> NAR <b>F</b> S <b>K</b> G <b>P</b> P <b>I</b> ND <b>M</b> F <b>T</b> DL <b>K</b> D <b>G</b> R <b>K</b> LL <b>D</b> LE <b>G</b> L <b>T</b> G <b>T</b> S <b>L</b> P <b>K</b> ..E <b>R</b> G <b>S</b> T <b>R</b> V <b>H</b> A <b>L</b> NN <b>V</b> N <b>V</b> L <b>Q</b> V <b>L</b> H <b>Q</b> NN <b>V</b> E <b>L</b> V <b>N</b> I <b>G</b> G <b>T</b> D <b>I</b> VD <b>G</b> N <b>H</b> K <b>L</b> T <b>L</b> GL <b>L</b> W <b>S</b> I <b>L</b> H <b>W</b>                                                                               | Consensus | .....e.....d <b>l</b> .....d <b>l</b> .....w <b>e</b> k <b>Q</b> .k <b>T</b> F <b>T</b> .W <b>c</b> N <b>.h</b> l.k.g.k...!#l..D <b>l</b> .#G <b>l</b> .L..L <b>L</b> E <b>v</b> l <b>s</b> .r <b>g</b> .....r <b>g</b> .....R <b>.h</b> .l..N <b>V</b> n <b>k</b> a <b>L</b> .f <b>l</b> .....!k <b>l</b> w <b>s</b> i <b>g</b> s..I <b>V</b> D <b>G</b> N.k <b>\$</b> t <b>L</b> G <b>\$</b> i <b>w</b> t <b>i</b> L <b>h</b> ..                                                                                                                                                                                                                                                       |           |                                                                                                                                                                                                                                                                                                                                                                                |
|      | CH2-A | CH2-B                                                                                                                                                                                                                                                                                                                                                                                                                                                                                                                                                                                      | CH2-C                                                                                                                                                                                 | CH2-D                                                                                                                                                                                                                                                                                                                                                                                                                                                                                                                                                                                                                                  | CH2-E | CH2-F                                                                                                                                                                                                                                                                                                                                                                                                                                                                                                                                                                                                                                     | CH2-G |                                                                                                                                                                                                                                                                                                                                                                                                                                                                                                                                                                                                                                                  |       |                                                                                                                                                                                                                                                                                                                                                                                                                                                                                                                                                                                                                                                  |     |                                                                                                                                                                                                                                                                                                                                                                                                                                                                                                                                                                                                                             |     |                                                                                                                                                                                                                                                                                                                                                                                                                                                                                                                                                                                                                                                                                                     |     |                                                                                                                                                                                                                                                                                                                                                                                                                                                                                                                                                                                                                                                              |     |                                                                                                                                                                                                                                                                                                                                                                                                                                                                                                                                                                                                                                                                    |           |                                                                                                                                                                                                                                                                                                                                                                                                                                                                                                                                                                                                                                                                                          |           |                                                                                                                                                                                                                                                                                                                                                                                |
| FLNa | 150   | ISMP <b>M</b> WDEEED <b>E</b> EAK <b>Q</b> TP <b>K</b> <b>R</b> L <b>G</b> W <b>I</b> Q <b>N</b> K <b>L</b> ...P <b>Q</b> L <b>P</b> I <b>T</b> N <b>F</b> S <b>R</b> D <b>W</b> S <b>G</b> <b>R</b> A <b>L</b> G <b>L</b> V <b>S</b> C <b>A</b> P <b>L</b> <b>V</b> PD <b>W</b> S <b>D</b> S <b>K</b> P <b>V</b> T <b>N</b> A <b>R</b> E <b>A</b> M <b>Q</b> A <b>D</b> D <b>W</b> L <b>G</b> I <b>P</b> Q <b>V</b> I <b>T</b> E <b>I</b> <b>D</b> .P <b>N</b> V <b>D</b> H <b>S</b> V <b>M</b> T <b>Y</b> L <b>S</b> Q <b>F</b> F <b>K</b> A <b>K</b> L <b>K</b> P <b>G</b> A <b>P</b> L | 123                                                                                                                                                                                   | ISMP <b>V</b> WDE <b>D</b> EG <b>D</b> DA <b>K</b> R <b>Q</b> TP <b>K</b> <b>R</b> L <b>L</b> G <b>W</b> I <b>Q</b> N <b>K</b> I...P <b>Y</b> L <b>P</b> I <b>T</b> N <b>F</b> N <b>Q</b> W <b>D</b> G <b>K</b> A <b>L</b> G <b>A</b> L <b>V</b> D <b>S</b> C <b>A</b> P <b>G</b> L <b>C</b> PD <b>W</b> E <b>S</b> <b>D</b> F <b>Q</b> K <b>P</b> V <b>D</b> N <b>A</b> R <b>E</b> A <b>M</b> <b>Q</b> A <b>D</b> D <b>W</b> L <b>G</b> V <b>P</b> Q <b>V</b> I <b>T</b> E <b>E</b> I <b>H</b> .P <b>D</b> V <b>D</b> H <b>S</b> V <b>M</b> T <b>Y</b> L <b>S</b> Q <b>F</b> F <b>K</b> A <b>K</b> L <b>K</b> P <b>G</b> A <b>P</b> L | 143   | ISMP <b>M</b> WDEE <b>D</b> ED <b>A</b> R <b>K</b> Q <b>T</b> P <b>K</b> <b>R</b> L <b>L</b> G <b>W</b> I <b>Q</b> N <b>K</b> V...P <b>Q</b> L <b>P</b> I <b>T</b> N <b>F</b> N <b>R</b> D <b>W</b> D <b>Q</b> G <b>K</b> A <b>L</b> G <b>L</b> V <b>D</b> N <b>C</b> A <b>P</b> G <b>L</b> C <b>P</b> D <b>W</b> E <b>A</b> W <b>D</b> P <b>N</b> Q <b>V</b> E <b>N</b> A <b>R</b> E <b>A</b> M <b>Q</b> A <b>D</b> D <b>W</b> L <b>G</b> V <b>P</b> Q <b>V</b> I <b>A</b> E <b>E</b> I <b>V</b> D.P <b>N</b> V <b>D</b> H <b>S</b> V <b>M</b> T <b>Y</b> L <b>S</b> Q <b>F</b> F <b>K</b> A <b>K</b> L <b>K</b> P <b>G</b> A <b>P</b> V | 136   | IQDIS..VE.....ETS <b>A</b> KE <b>G</b> L <b>L</b> L <b>W</b> C <b>Q</b> R <b>K</b> T <b>A</b> P <b>Y</b> K <b>N</b> V <b>N</b> I <b>Q</b> N <b>F</b> H <b>I</b> S <b>W</b> K <b>D</b> G <b>L</b> G <b>F</b> C <b>A</b> L <b>I</b> H <b>R</b> H <b>R</b> P <b>D</b> L <b>I</b> D <b>Y</b> G <b>K</b> L <b>R</b> .K <b>D</b> D <b>P</b> L <b>T</b> N <b>L</b> N <b>T</b> A <b>F</b> D <b>V</b> A <b>E</b> K <b>Y</b> L <b>D</b> I <b>P</b> K <b>M</b> L <b>D</b> A <b>E</b> D <b>I</b> V <b>G</b> T <b>A</b> R <b>P</b> D <b>E</b> K <b>A</b> I <b>M</b> T <b>Y</b> V <b>S</b> S <b>P</b> Y <b>H</b> A <b>F</b> S <b>G</b> A <b>Q</b> K <b>A</b> E | 143   | IQDIS..VE.....ETS <b>A</b> KE <b>G</b> L <b>L</b> L <b>W</b> C <b>Q</b> R <b>K</b> T <b>A</b> P <b>Y</b> R <b>N</b> V <b>N</b> I <b>Q</b> N <b>F</b> H <b>T</b> S <b>W</b> K <b>D</b> G <b>L</b> G <b>L</b> C <b>A</b> L <b>I</b> H <b>R</b> H <b>R</b> P <b>D</b> L <b>I</b> D <b>Y</b> S <b>K</b> L <b>N</b> .K <b>D</b> D <b>P</b> I <b>G</b> N <b>I</b> N <b>L</b> A <b>M</b> E <b>I</b> A <b>E</b> K <b>H</b> L <b>D</b> I <b>P</b> K <b>M</b> L <b>D</b> A <b>E</b> D <b>I</b> V <b>N</b> T <b>P</b> K <b>P</b> D <b>E</b> R <b>A</b> I <b>M</b> T <b>Y</b> V <b>S</b> C <b>F</b> Y <b>H</b> A <b>F</b> A <b>G</b> A <b>E</b> Q <b>A</b> E | 150 | IQDIS..VE.....ETS <b>A</b> KE <b>G</b> L <b>L</b> L <b>W</b> C <b>Q</b> R <b>K</b> T <b>A</b> P <b>Y</b> R <b>N</b> V <b>N</b> Q <b>N</b> F <b>H</b> T <b>S</b> W <b>K</b> D <b>G</b> L <b>A</b> L <b>C</b> A <b>L</b> I <b>H</b> R <b>H</b> R <b>P</b> D <b>L</b> I <b>D</b> Y <b>A</b> K <b>L</b> R.K <b>D</b> D <b>P</b> V <b>T</b> N <b>L</b> N <b>A</b> F <b>E</b> V <b>A</b> E <b>K</b> Y <b>L</b> D <b>I</b> P <b>K</b> M <b>L</b> D <b>A</b> E <b>D</b> I <b>V</b> N <b>T</b> A <b>R</b> P <b>D</b> E <b>K</b> A <b>I</b> M <b>T</b> Y <b>V</b> S <b>F</b> Y <b>H</b> A <b>F</b> S <b>G</b> A <b>Q</b> K <b>A</b> E | 155 | IQDIS..VE.....ETS <b>A</b> KE <b>G</b> L <b>L</b> L <b>W</b> C <b>Q</b> R <b>K</b> T <b>A</b> P <b>Y</b> K <b>N</b> V <b>N</b> Q <b>N</b> F <b>H</b> I <b>S</b> W <b>K</b> D <b>L</b> A <b>F</b> N <b>A</b> L <b>I</b> H <b>R</b> H <b>R</b> P <b>E</b> L <b>I</b> E <b>D</b> K <b>L</b> R.K <b>D</b> D <b>P</b> V <b>T</b> N <b>L</b> N <b>A</b> F <b>E</b> V <b>A</b> E <b>K</b> Y <b>L</b> D <b>I</b> P <b>K</b> M <b>L</b> D <b>A</b> E <b>D</b> I <b>V</b> N <b>T</b> A <b>R</b> P <b>D</b> E <b>K</b> A <b>I</b> M <b>T</b> Y <b>V</b> S <b>F</b> Y <b>H</b> A <b>F</b> S <b>G</b> A <b>Q</b> K <b>A</b> E                                                                                    | 162 | IQDIS..V <b>E</b> T <b>E</b> D <b>N</b> K <b>E</b> K <b>S</b> A <b>K</b> D <b>A</b> L <b>L</b> W <b>C</b> Q <b>M</b> K <b>T</b> A <b>G</b> Y <b>P</b> N <b>V</b> N <b>V</b> H <b>N</b> F <b>T</b> S <b>W</b> R <b>D</b> G <b>L</b> A <b>F</b> N <b>A</b> I <b>V</b> H <b>K</b> H <b>R</b> P <b>D</b> L <b>L</b> D <b>F</b> E <b>S</b> L <b>K</b> .K <b>C</b> N <b>A</b> H <b>Y</b> N <b>L</b> Q <b>N</b> A <b>F</b> N <b>A</b> E <b>K</b> E <b>L</b> G <b>L</b> T <b>K</b> L <b>D</b> P <b>E</b> D.V <b>N</b> V <b>D</b> Q <b>P</b> D <b>E</b> K <b>S</b> I <b>I</b> T <b>Y</b> V <b>A</b> T <b>Y</b> H <b>Y</b> F <b>S</b> K <b>M</b> K <b>A</b> L <b>A</b> | 120 | V <b>K</b> N <b>V</b> M..K <b>N</b> I <b>M</b> A <b>G</b> L <b>Q</b> T <b>N</b> S <b>E</b> K <b>I</b> L <b>L</b> S <b>W</b> R <b>Q</b> S <b>T</b> R <b>N</b> Y <b>Q</b> V <b>N</b> V <b>I</b> N <b>F</b> T <b>T</b> S <b>W</b> S <b>D</b> G <b>L</b> <b>L</b> N <b>I</b> H <b>S</b> H <b>R</b> P <b>D</b> L <b>F</b> D <b>W</b> N <b>S</b> V <b>V</b> C <b>Q</b> S <b>A</b> T <b>Q</b> R <b>L</b> E <b>H</b> A <b>F</b> N <b>I</b> A <b>R</b> Y <b>Q</b> L <b>G</b> I <b>E</b> K <b>L</b> L <b>D</b> P <b>E</b> D.V <b>D</b> T <b>T</b> Y <b>P</b> D <b>K</b> K <b>S</b> I <b>L</b> M <b>I</b> T <b>S</b> L <b>F</b> Q <b>V</b> L <b>P</b> Q <b>V</b> S <b>I</b> E | 137       | V <b>K</b> D <b>V</b> M..K <b>D</b> V <b>M</b> S <b>D</b> L <b>Q</b> T <b>N</b> S <b>E</b> K <b>I</b> L <b>L</b> S <b>W</b> R <b>Q</b> T <b>T</b> R <b>P</b> Y <b>S</b> Q <b>V</b> N <b>V</b> L <b>N</b> F <b>T</b> T <b>S</b> W <b>D</b> G <b>L</b> A <b>F</b> N <b>A</b> V <b>L</b> H <b>R</b> H <b>K</b> P <b>D</b> L <b>F</b> S <b>W</b> D <b>K</b> V <b>V</b> .K <b>M</b> S <b>P</b> I <b>E</b> R <b>L</b> E <b>H</b> A <b>F</b> S <b>K</b> A <b>Q</b> Y <b>L</b> G <b>I</b> E <b>K</b> L <b>L</b> D <b>P</b> E <b>D</b> .V <b>A</b> V <b>Q</b> L <b>P</b> D <b>K</b> K <b>S</b> I <b>M</b> Y <b>L</b> T <b>S</b> L <b>F</b> E <b>V</b> L <b>P</b> Q <b>Q</b> V <b>T</b> I <b>D</b> | Consensus | !..d.....#.....t..k..L <b>L</b> .W <b>.q</b> .k <b>t</b> ..y <b>p</b> #v <b>n</b> !..N <b>F</b> .t <b>s</b> W <b>.D</b> g <b>l</b> a <b>l</b> .A <b>l</b> .h <b>.h</b> r <b>P</b> L <b>d</b> .....k..p..n <b>l</b> ..A <b>f</b> ..A <b>..L</b> g <b>i</b> p <b>k</b> .l <b>d</b> p <b>e</b> #i <b>v</b> ....p <b>D</b> e <b>k</b> s! <b>mt</b> Y <b>.s</b> .f <b>..a</b> ..... |

### Supplementary Note. Protein sequence alignment of selected human ABDs.

ABDs of FLNa (UniProt Accession Code O21333), FLNb (O75369), FLNc (Q14315),  $\alpha$ -actinin 1 (ACTN1 P12814), ACTN2 (P35609), ACTN3 (Q08043), ACTN4 (O43707),  $\beta$ -III-spectrin (SPTN2 O15020), dystrophin (DMD P11532), utrophin (UTRO P46939) were aligned using MultAlin<sup>1</sup>. F-actin-interacting regions in FLNa are bolded and boxed (red = ABS-N, green = ABS2', blue = ABS2). Secondary structure  $\alpha$ -helical elements from FLNa are shown above the alignment as  $\alpha$ 's and are labeled with the corresponding CH domain and helix letter identifier. The consensus sequence indicates high conservation (>90%, upper-case amino acid code abbreviation), low conservation (50-90%, lower-case abbreviation), or molecular group conservation (! = I or V, \$ = L or M, % = F or Y, # = N, D, Q, or E). Highlighted residues indicate disease-associated point mutations at this position: magenta = PVNH<sup>2-11</sup>, blue = OPDSD<sup>12-17</sup>, yellow = Larsen syndrome, atelosteogenesis I and III and Boomerang dysplasia disorders<sup>18-23</sup>, orange = distal and cardiomyopathies<sup>24-29</sup>, grey = macrothrombocytopenia<sup>30</sup>, maroon = focal segmental glomerulosclerosis<sup>31-33</sup>, black = spinocerebellar ataxia type 5<sup>34</sup>, green = Duchenne's muscular dystrophy<sup>35,36</sup>, purple = Becker muscular dystrophy<sup>37-41</sup>.

## Supplementary Note References

1. Corpet, F. Multiple sequence alignment with hierarchical clustering. *Nucleic Acids Res.* **16**, 10881–10890 (1988).
2. Solé, G. *et al.* Bilateral periventricular nodular heterotopia in France: Frequency of mutations in FLNA, phenotypic heterogeneity and spectrum of mutations. *J. Neurol. Neurosurg. Psychiatry* **80**, 1394–1398 (2009).
3. Sheen, V. L. *et al.* Filamin A mutations cause periventricular heterotopia with Ehlers-Danlos syndrome. *Neurology* **64**, 254–262 (2005).
4. Gómez-Garre, P. *et al.* Ehlers-Danlos syndrome and periventricular nodular heterotopia in a Spanish family with a single FLNA mutation. *J. Med. Genet.* **43**, 232–237 (2006).
5. Guerrini, R. *et al.* Germline and mosaic mutations of FLN1 in men with periventricular heterotopia. *Neurology* **63**, 51–56 (2004).
6. Moro, F. *et al.* Familial periventricular heterotopia: missense and distal truncating mutations of the FLN1 gene. *Neurology* **58**, 916–921 (2002).
7. De Wit, M. C. Y. *et al.* Combined cardiological and neurological abnormalities due to filamin A gene mutation. *Clin. Res. Cardiol.* **100**, 45–50 (2011).
8. Liu, W. *et al.* Sporadic periventricular nodular heterotopia: Classification, phenotype and correlation with Filamin A mutations. *Epilepsy Res.* **133**, 33–40 (2017).
9. Reinstein, E. *et al.* Vascular and connective tissue anomalies associated with X-linked periventricular heterotopia due to mutations in Filamin A. *Eur. J. Hum. Genet.* **21**, 494–502 (2013).
10. Parrini, E. *et al.* Periventricular heterotopia : phenotypic heterogeneity and correlation with Filamin A mutations. *Brain* **72**, 1892–1906 (2006).
11. Lange, M. *et al.* 47 patients with FLNA associated periventricular nodular heterotopia. *Orphanet J. Rare Dis.* **10**, 134 (2015).
12. Robertson, S. P. *et al.* Localized mutations in the gene encoding the cytoskeletal protein filamin A cause diverse malformations in humans. *Nat. Genet.* **33**, 487–491 (2003).
13. Moutton, S. *et al.* Otopalatodigital spectrum disorders: refinement of the phenotypic and mutational spectrum. *J. Hum. Genet.* **61**, 693–699

(2016).

14. Naudion, S. *et al.* Fetal phenotypes in otopalatodigital spectrum disorders. *Clin. Genet.* **89**, 371–377 (2016).
15. Robertson, S. P. *et al.* Frontometaphyseal Dysplasia: Mutations in FLNA and Phenotypic Diversity. *Am. J. Med. Genet. A* **140A**, 1726–1736 (2006).
16. Mariño-Enríquez, A., Lapunzina, P., Robertson, S. P. & Rodríguez, J. I. Otopalatodigital Syndrome Type 2 in Two Siblings With a Novel Filamin A 629G-T Mutation: Clinical, Pathological, and Molecular Findings. *Am. J. Med. Genet. A* **143A**, 2106–2112 (2007).
17. Parrini, E. *et al.* Familial periventricular nodular heterotopia, epilepsy and Melnick-Needles Syndrome caused by a single FLNA mutation with combined gain-of-function and loss-of-function effects. *J. Med. Genet.* **52**, 405–412 (2015).
18. Farrington-Rock, C. *et al.* Mutations in two regions of FLNB result in atelosteogenesis I and III. *Hum. Mutat.* **27**, 705–710 (2006).
19. Jeon, G. W. *et al.* Identification of a de novo heterozygous missense FLNB mutation in lethal atelosteogenesis type i by exome sequencing. *Ann. Lab. Med.* **34**, 134–138 (2014).
20. Bicknell, L. S. *et al.* Mutations in FLNB cause boomerang dysplasia. *J. Med. Genet.* **42**, e43 (2005).
21. Daniel, P. B. *et al.* Disease-associated mutations in the actin-binding domain of filamin B cause cytoplasmic focal accumulations correlating with disease severity. *Hum. Mutat.* **33**, 665–673 (2012).
22. Krakow, D. *et al.* Mutations in the gene encoding filamin B disrupt vertebral segmentation, joint formation and skeletogenesis. *Nat. Genet.* **36**, 405–410 (2004).
23. Bicknell, L. S. *et al.* A molecular and clinical study of Larsen syndrome caused by mutations in FLNB. *J. Med. Genet.* **44**, 89–98 (2007).
24. Valdés-Mas, R. *et al.* Mutations in filamin C cause a new form of familial hypertrophic cardiomyopathy. *Nat. Commun.* **5**, 5326 (2014).
25. Duff, R. M. *et al.* Mutations in the N-terminal actin-binding domain of filamin C cause a distal myopathy. *Am. J. Hum. Genet.* **88**, 729–740 (2011).

26. Mohapatra, B. *et al.* Mutations in the muscle LIM protein and  $\alpha$ -actinin-2 genes in dilated cardiomyopathy and endocardial fibroelastosis. *Mol. Genet. Metab.* **80**, 207–215 (2003).
27. Theis, J. L. *et al.* Echocardiographic-determined septal morphology in Z-disc hypertrophic cardiomyopathy. *Biochem. Biophys. Res. Commun.* **351**, 896–902 (2006).
28. Bagnall, R. D., Molloy, L. K., Kalman, J. M. & Semsarian, C. Exome sequencing identifies a mutation in the ACTN2 gene in a family with idiopathic ventricular fibrillation, left ventricular noncompaction, and sudden death. *BMC Med. Genet.* **15**, 99 (2014).
29. Girolami, F. *et al.* Novel alpha-actinin 2 variant associated with familial hypertrophic cardiomyopathy and juvenile atrial arrhythmias. *Circ. Cardiovasc. Genet.* **7**, 741–750 (2014).
30. Kunishima, S. *et al.* ACTN1 mutations cause congenital macrothrombocytopenia. *Am. J. Hum. Genet.* **92**, 431–438 (2013).
31. Weins, A. *et al.* Mutational and Biological Analysis of  $\alpha$ -Actinin-4 in Focal Segmental Glomerulosclerosis. *J. Am. Soc. Nephrol.* **16**, 3694–3701 (2005).
32. Kaplan, J. M. *et al.* Mutations in ACTN4, encoding alpha-actinin-4, cause familial focal segmental glomerulosclerosis. *Nat. Genet.* **24**, 251–256 (2000).
33. Bartram, M. P. *et al.* Three-layered proteomic characterization of a novel ACTN4 mutation unravels its pathogenic potential in FSGS. *Hum. Mol. Genet.* **25**, 1152–1164 (2015).
34. Ikeda, Y. *et al.* Spectrin mutations cause spinocerebellar ataxia type 5. *Nat. Genet.* **38**, 184–190 (2006).
35. Juan-Mateu, J. *et al.* Interplay between DMD Point Mutations and Splicing Signals in Dystrophinopathy Phenotypes. *PLoS One* **8**, e59916 (2013).
36. Prior, T. W. *et al.* A missense mutation in the dystrophin gene in a Duchenne muscular dystrophy patient. *Nat. Genet.* **4**, 357–360 (1993).
37. Kesari, A. *et al.* Integrated DNA, cDNA and protein studies in Becker muscular dystrophy show high exception to the reading frame rule. *Hum.*

*Mutat.* **29**, 728–737 (2008).

38. Hamed, S. A., Sutherland-Smith, A. J., Gorospe, J. R. M., Kendrick-Jones, J. & Hoffman, E. P. DNA sequence analysis for structure/function and mutation studies in Becker muscular dystrophy. *Clin. Genet.* **68**, 69–79 (2005).
39. Magri, F. *et al.* Clinical and molecular characterization of a cohort of patients with novel nucleotide alterations of the Dystrophin gene detected by direct sequencing. *BMC Med. Genet.* **12**, 37 (2011).
40. Roberts, R. G., Gardner, R. J. & Bobrow, M. Searching for the 1 in 2,400,000: A review of Dystrophin Gene Point Mutations. *Hum. Mutat.* **4**, 1–11 (1994).
41. Norwood, F. L. M., Sutherland-Smith, A. J., Keep, N. H. & Kendrick-Jones, J. The structure of the N-terminal actin-binding domain of human dystrophin and how mutations in this domain may cause Duchenne or Becker muscular dystrophy. *Structure* **8**, 481–491 (2000).
